# Supplementary material
Source: publisher figshare collection journal article supplement (https://springernature.figshare.com/ndownloader/files/14616008)
Supplement: Supplementary file [file 14616008]

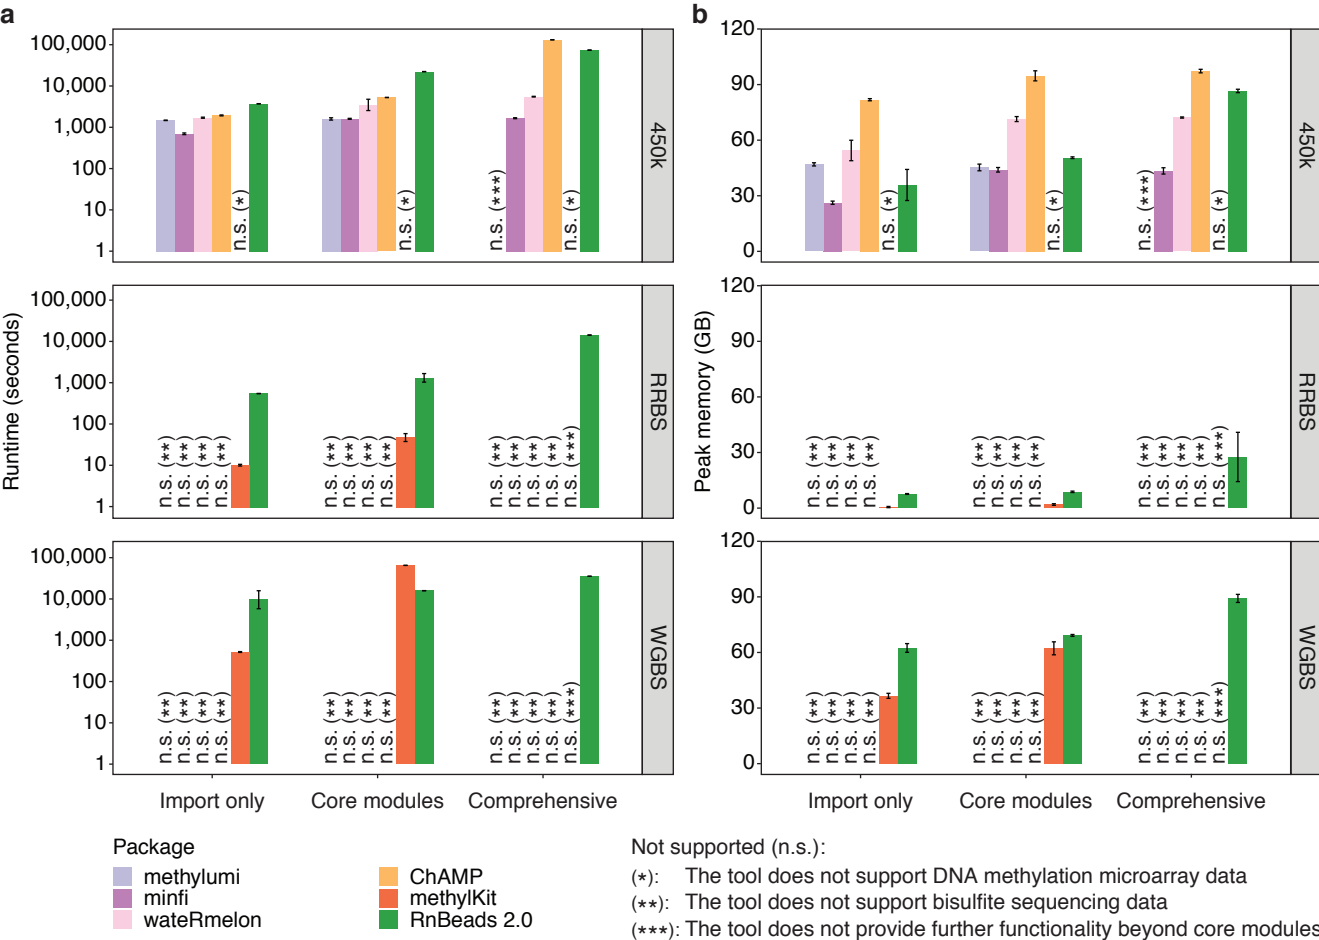

**Figure S1.** Performance of RnBeads and other DNA methylation analysis packages.

The performance of RnBeads was compared to other R packages for DNA methylation analysis in terms of **(a)** runtime and **(b)** peak memory consumption. The packages were applied to three datasets corresponding to the Infinium 450k, RRBS, and WGBS platforms, and they were run in three different settings (data import only, core modules, comprehensive analysis) as described in the Methods section.
